# Supplementary material
Source: Frontiers journal article supplement (https://www.frontiersin.org/articles/549453)
Supplement: Data_Sheet_1.docx [file Data_Sheet_1.docx]

# Appendix B

*Translated Information Literacy Questionnaire*

**Questionnaire Information Literacy**

**Participant-ID: ­­­ _________**

The next four question are about your background information. This information remains anonymous and will only be used in combination with your participant-ID.

**Age: _________**

**Sex: _________**

**Organisation / Function / Experience (in years): _________ / _________ _________ / _________**

**Questionnaire Information Literacy:**

The following 20 statements are intended to measure your level of Information Literacy proficiency. The questions are formulated in such a way that they are in the context of decision-making situations. This concerns the approach you use to make a decision. The search for information, which you will encounter in several questions, is intended in a broad sense. It may be that you ask colleagues, use the internet, or other ways to gather information. In short, it is about your attitude and handling of information (information literacy proficiency) Please complete the questionnaire as honestly as possible. All your answers are completely anonymized.

Mark the box that best describes your answer/behavior for the next 20 statements.

1. **In order to be able to make a good decision, I name/define important key concepts of the situation and actively search for information based on these key concepts.**

| Completely disagree | Disagree | Slightly disagree | Neither agree nor disagree | Slightly agree | Agree | Completely agree |
| --- | --- | --- | --- | --- | --- | --- |
| **○** | **○** | **○** | **○** | **○** | **○** | **○** |

1. **If the information collected is insufficient, I know why and how I need to change my information search strategy in order to achieve the goal.**

| Completely disagree | Disagree | Slightly disagree | Neither agree nor disagree | Slightly agree | Agree | Completely agree |
| --- | --- | --- | --- | --- | --- | --- |
| **○** | **○** | **○** | **○** | **○** | **○** | **○** |

1. **It is important to communicate well how I came to a decision.**

| Completely disagree | Disagree | Slightly disagree | Neither agree nor disagree | Slightly agree | Agree | Completely agree |
| --- | --- | --- | --- | --- | --- | --- |
| **○** | **○** | **○** | **○** | **○** | **○** | **○** |

1. **I make a distinction between sources that are important to the situation and sources that are not.**

| Completely disagree | Disagree | Slightly disagree | Neither agree nor disagree | Slightly agree | Agree | Completely agree |
| --- | --- | --- | --- | --- | --- | --- |
| **○** | **○** | **○** | **○** | **○** | **○** | **○** |

1. **I can adapt my decision-making process to any new information about the situation.**

| Completely disagree | Disagree | Slightly disagree | Neither agree nor disagree | Slightly agree | Agree | Completely agree |
| --- | --- | --- | --- | --- | --- | --- |
| **○** | **○** | **○** | **○** | **○** | **○** | **○** |

1. **I only use sources I already know to collect information.**

| Completely disagree | Disagree | Slightly disagree | Neither agree nor disagree | Slightly agree | Agree | Completely agree |
| --- | --- | --- | --- | --- | --- | --- |
| **○** | **○** | **○** | **○** | **○** | **○** | **○** |

1. **I always look at individual pieces of information in relation to another.**

| Completely disagree | Disagree | Slightly disagree | Neither agree nor disagree | Slightly agree | Agree | Completely agree |
| --- | --- | --- | --- | --- | --- | --- |
| **○** | **○** | **○** | **○** | **○** | **○** | **○** |
|  |  |  |  |  |  |  |

1. **I always look critically at incoming information.**

| Completely disagree | Disagree | Slightly disagree | Neither agree nor disagree | Slightly agree | Agree | Completely agree |
| --- | --- | --- | --- | --- | --- | --- |
| **○** | **○** | **○** | **○** | **○** | **○** | **○** |

1. **If the information viewed has no added value for the decision-making process, I sometimes still make a decision.**

| Completely disagree | Disagree | Slightly disagree | Neither agree nor disagree | Slightly agree | Agree | Completely agree |
| --- | --- | --- | --- | --- | --- | --- |
| **○** | **○** | **○** | **○** | **○** | **○** | **○** |

1. **Instead of searching for information, I rely on my experience and intuition when I know little about the situation, even when there is plenty of time.**

| Completely disagree | Disagree | Slightly disagree | Neither agree nor disagree | Slightly agree | Agree | Completely agree |
| --- | --- | --- | --- | --- | --- | --- |
| **○** | **○** | **○** | **○** | **○** | **○** | **○** |

1. **I always take notes when collecting information and I summarise it.**

| Completely disagree | Disagree | Slightly disagree | Neither agree nor disagree | Slightly agree | Agree | Completely agree |
| --- | --- | --- | --- | --- | --- | --- |
| **○** | **○** | **○** | **○** | **○** | **○** | **○** |

1. **When I make a decision, I always include my previous experiences from similar situations, in addition to new information.**

| Completely disagree | Disagree | Slightly disagree | Neither agree nor disagree | Slightly agree | Agree | Completely agree |
| --- | --- | --- | --- | --- | --- | --- |
| **○** | **○** | **○** | **○** | **○** | **○** | **○** |
|  |  |  |  |  |  |  |

1. **I think twice about available information before making a decision.**

| Completely disagree | Disagree | Slightly disagree | Neither agree nor disagree | Slightly agree | Agree | Completely agree |
| --- | --- | --- | --- | --- | --- | --- |
| **○** | **○** | **○** | **○** | **○** | **○** | **○** |

1. **Even if it can take a lot of time, I still ask for extra information.**

| Completely disagree | Disagree | Slightly disagree | Neither agree nor disagree | Slightly agree | Agree | Completely agree |
| --- | --- | --- | --- | --- | --- | --- |
| **○** | **○** | **○** | **○** | **○** | **○** | **○** |

1. **To make a decision, I use both new information and my own experience.**

| Completely disagree | Disagree | Slightly disagree | Neither agree nor disagree | Slightly agree | Agree | Completely agree |
| --- | --- | --- | --- | --- | --- | --- |
| **○** | **○** | **○** | **○** | **○** | **○** | **○** |

1. **I check whether different sources of information contradict each other.**

| Completely disagree | Disagree | Slightly disagree | Neither agree nor disagree | Slightly agree | Agree | Completely agree |
| --- | --- | --- | --- | --- | --- | --- |
| **○** | **○** | **○** | **○** | **○** | **○** | **○** |

1. **Some sources I never use, even when I know they have knowledge of the situation.**

| Completely disagree | Disagree | Slightly disagree | Neither agree nor disagree | Slightly agree | Agree | Completely agree |
| --- | --- | --- | --- | --- | --- | --- |
| **○** | **○** | **○** | **○** | **○** | **○** | **○** |
|  |  |  |  |  |  |  |

1. **If I get information from different sources (Google, newspapers, social media), I know I have to value them differently.**

| Completely disagree | Disagree | Slightly disagree | Neither agree nor disagree | Slightly agree | Agree | Completely agree |
| --- | --- | --- | --- | --- | --- | --- |
| **○** | **○** | **○** | **○** | **○** | **○** | **○** |

1. **Once I have chosen a strategy to gather information, I stick with it, even if I notice that it does not yield good results.**

| Completely disagree | Disagree | Slightly disagree | Neither agree nor disagree | Slightly agree | Agree | Completely agree |
| --- | --- | --- | --- | --- | --- | --- |
| **○** | **○** | **○** | **○** | **○** | **○** | **○** |

1. **I summarize the common meaning of several pieces of information for myself.**

| Completely disagree | Disagree | Slightly disagree | Neither agree nor disagree | Slightly agree | Agree | Completely agree |
| --- | --- | --- | --- | --- | --- | --- |
| **○** | **○** | **○** | **○** | **○** | **○** | **○** |
