# Supplementary material
Source: Frontiers journal article supplement (https://www.frontiersin.org/articles/549453)
Supplement: Table_1.docx [file Table_1.docx]

# Appendix A

Table A.1

*Example dilemma translated from Dutch to English.*

| Dilemma | Dilemma Text  “Public buildings” | Because the synagogue is centrally located in Trouveen, there are several public buildings in the vicinity. The crisis team will discuss whether you are going to close them. |
| --- | --- | --- |
| Question Text | Are you going to close the public buildings near the synagogue? |
| Information Item | Ministry of public affairs (OM) | 1. It is not at all certain if anyone else is a fugitive. 2. That would only interfere with the normal course of events. |
| Strategic communications advisor (SC) | 1. On Twitter, people write that they have seen a suspicious person walking in the direction of the city center. 2. I do not have any new information. |
| Policy advisor (BA) | 1. In the vicinity of the synagogue there are schools and the hospital, not everyone here is self-reliant. 2. It is better to close the buildings preventively. |
| Operational leader (OL) | 1. We do not have enough crisis staff to protect all public buildings. 2. The initial investigation shows there is a good chance it was a terroristic attack. |
| Spokesman synagogue (SY) | 1. It is enough that we were hit. 2. I have already talked to the representatives of the other religious buildings in Trouveen. |
